# Supplementary material for: Involvement of Disperse Repetitive Sequences in Wheat/Rye Genome Adjustment
Source: PubMed Central journal article supplement (PMC3430250; doi:10.3390/ijms13078549), 2012-07-10

# Involvement of Disperse Repetitive Sequences in Wheat/Rye Genome Adjustment

## Supplementary Information

**Figure S1.** 20H1 Alignment. Full multiple alignments obtained with BioEdit of the expected segment of pSc20H (pSc20H\_20H1) and 20H1 internal sequence amplified from rye and wheat-rye addition lines 1R, 5R and 6R.

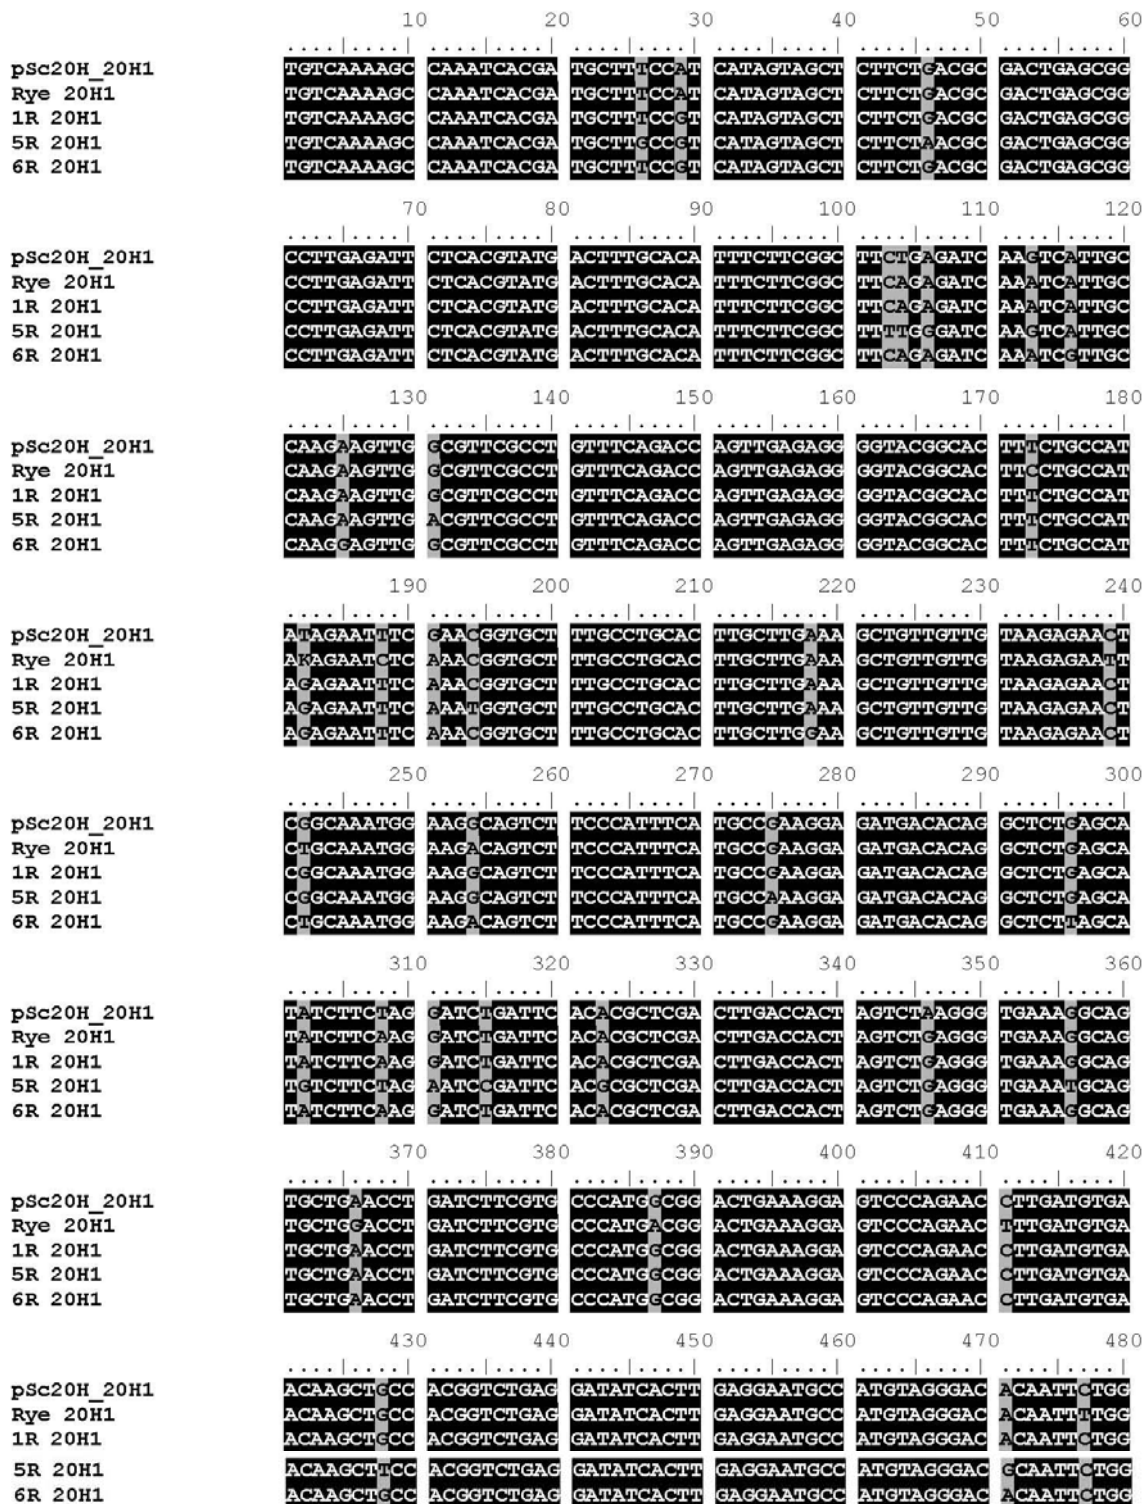

Figure S1. Cont.

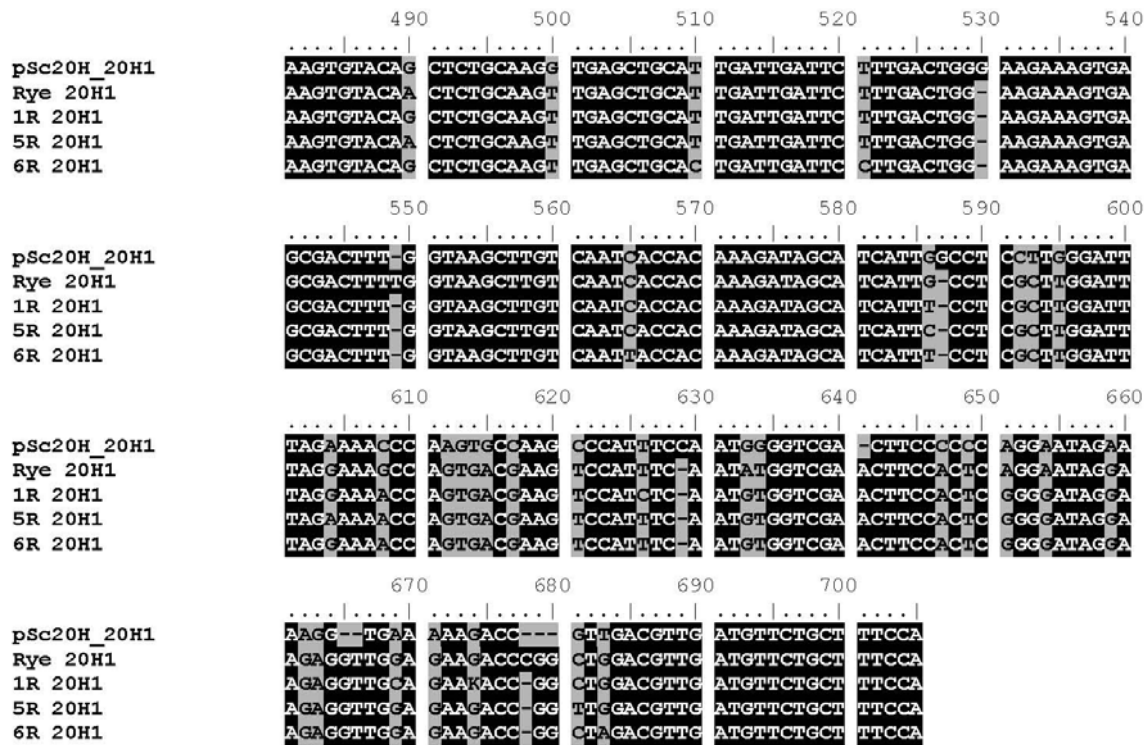

Figure S2. 20H1 Alignment. Full multiple alignments obtained with BioEdit of 20H1 internal sequence amplified from wheat and wheat-rye addition lines 3R, 4R and 7R and *T.aestivum* BAC400N24 (JF292901.1).

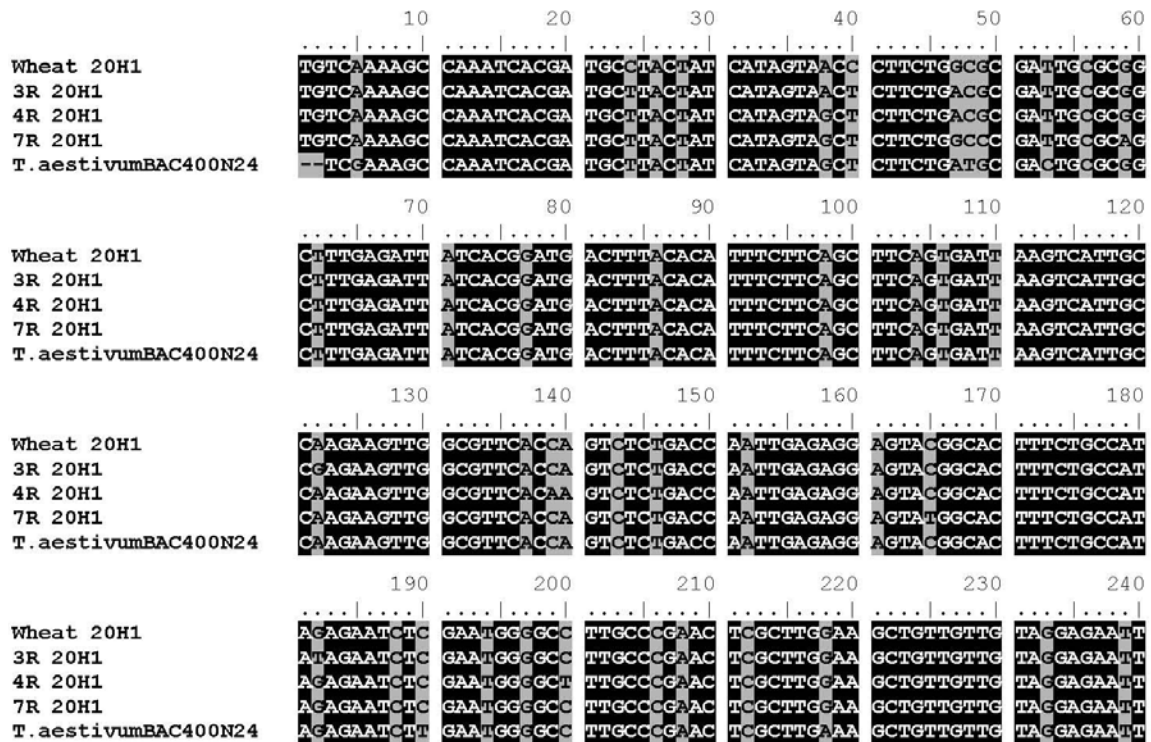

Figure S2. Cont.

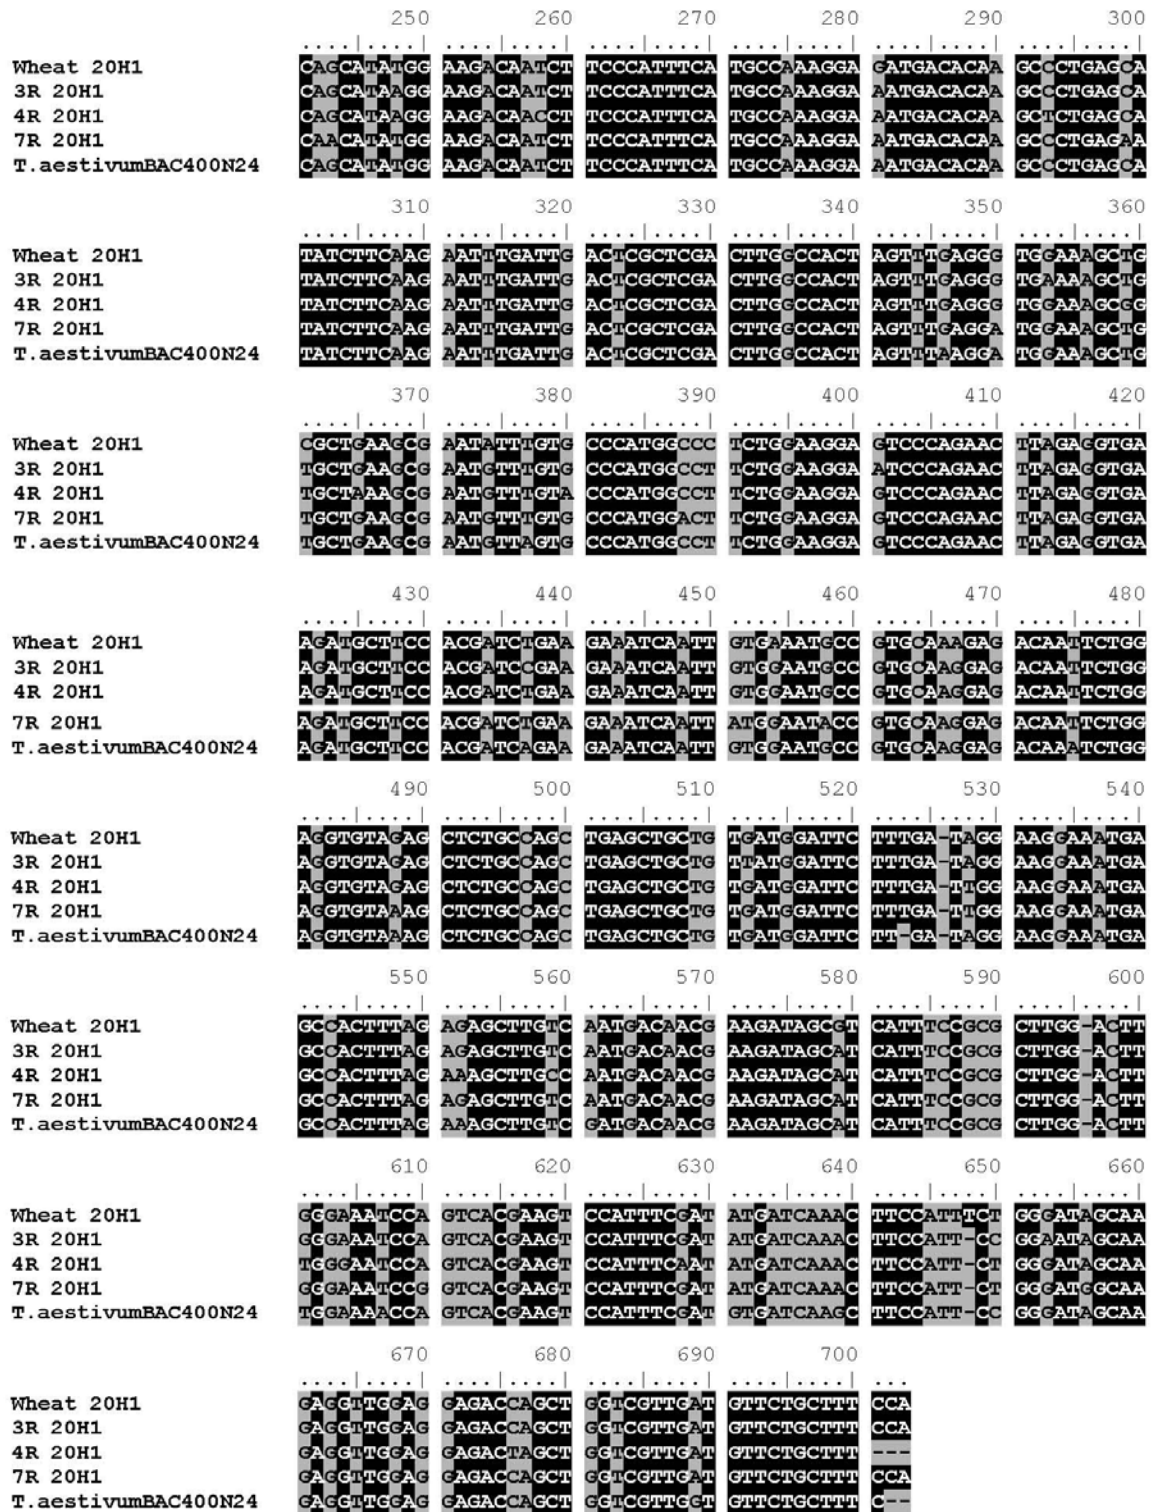

Supplement: ijms-13-08549-s001.pdf [file ijms-13-08549-s001.pdf]
